# Supplementary material for: Supplementation of Alhagi honey polysaccharides contributes to the improvement of the intestinal immunity regulating the structure of intestinal flora in mice
Source: Royal Society of Chemistry journal article supplement (doi:10.1039/d1fo01860d), 2021-01-01
Supplement: d1fo01860d1.pdf [file d1fo01860d1.pdf]

1 **Supplementation of Alhagi honey**  
2 **polysaccharides contributes to the**  
3 **improvement of the intestinal**  
4 **immunity and regulating the**  
5 **structure of intestinal flora in**  
6 **mice**

7  
8  
9  
10  
11  
12  
13  
14  
15  
16  
17  
18  
19

**SUPPLEMENTAL INFORMATION**

20 **Supplementary Figure S1**

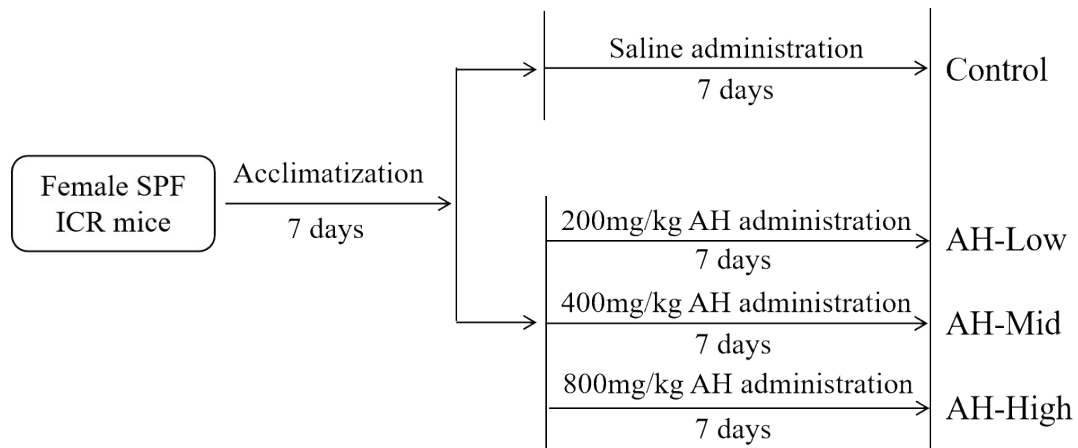

21

22 **Supplementary Figure S1.** Experimental design (n = 5 in each group). Twenty ICR

23 mice were assigned to four groups randomly: Control, AH-Low group with 200

24 mg/kg AH; AH-Mid group with 400 mg/kg AH; AH-High group with 800 mg/kg AH.

25

26

27

28

29

30

31

32

33

34

35

36

37

### 38 **Supplementary Table S1**

#### 39 Compositions of experimental diets

| <b>Ingredient (g/kg)</b>             |       |
|--------------------------------------|-------|
| Protein                              | 192   |
| Fat                                  | 66    |
| Fiber                                | 33    |
| Ash                                  | 58    |
| Carbohydrate                         | 610   |
| Amino acid <sup>a</sup>              | 217.2 |
| Minerals <sup>b</sup>                | 18.72 |
| Vitamins <sup>c</sup>                | 2.32  |
| <b>Nutrient level</b>                |       |
| Total energy of diets (kcal/g)       | 3.6   |
| Protein energy supply ratio (%)      | 20.6  |
| Fat energy supply ratio (%)          | 12    |
| Carbohydrate energy supply ratio (%) | 67.4  |
| Total energy of AAP (kcal/kg)        | 2050  |
| AAP-L energy supply ratio (‰)        | 0.56  |
| AAP-M energy supply ratio (‰)        | 0.28  |
| AAP-H energy supply ratio (‰)        | 0.14  |

40 <sup>a</sup> Provided per kilogram of Amino acid in diet: Alanine (12.9 g), Arginine (13 g),  
 41 Aspartic acid (17.4 g), Cysteine (3.6 g), Glutamic acid (34.4 g), Glycine (13.2 g),  
 42 Histidine (5.6 g), Isoleucine (11.8 g), Leucine (17.5 g), Lysine (14.2 g), Methionine (7  
 43 g), Phenylalanine (9.2 g), Proline (16.7 g), Serine (10.6 g), Threonine (10.5 g),  
 44 Tryptophan (2.6 g), Tyrosine (7.6 g), Valine (9.4 g); <sup>b</sup> Provided per kilogram of  
 45 Minerals in diet: Arsenic (0.00032 g), Cadmium (0.000042 g), Calcium (11.1 g),  
 46 Copper (0.016 g), Iodine (0.0011 g), Iron (0.32 g), Lead (0.00014 g), Magnesium

47 (2.16 g), Manganese (0.162 g), Mercury (Not detected), Phosphorus (8.5 g),  
48 Potassium (7.84 g), Selenium (0.00037 g), Sodium (2.24 g), Zinc (0.14 g); <sup>c</sup> Provided  
49 per kilogram of Vitamins in diet: Biotin (388 µg), Choline (1.84 g), Folic acid (0.0055  
50 g), Niacin (0.088 g), Pantothenic acid (0.037 g), Pyridoxine (0.017 g), Riboflavin  
51 (0.019 g), Thiamin (0.085 g), Vitamin A (25700 IU), Vitamin B12 (28.6 µg), Vitamin  
52 D3 (4360 IU), Vitamin E (195 IU), Vitamin K3 (0.021 g).

53

54

55

56

57

58

59

60

61

62

63

64

65

66

67

68

69 **Supplementary Table S2**

70 Primer sequences used for RT-qPCR

| Gene          | Direction      | Primer sequence (5'–3')       |
|---------------|----------------|-------------------------------|
| IL-2          | Forward primer | 5'-TGAGCAGGATGGAGAATTACAGG-3' |
|               | Reverse primer | 5'-GTCCAAGTTCATCTTCTAGGCAC-3' |
| IL-4          | Forward primer | 5'-GGTCTCAACCCCCAGCTAGT-3'    |
|               | Reverse primer | 5'-GCCGATGATCTCTCTCAAGTGAT-3' |
| IL-6          | Forward primer | 5'-CCAAGAGGTGAGTGCTTCCC-3'    |
|               | Reverse primer | 5'-CTGTTGTTCCAGACTCTCTCCCT-3' |
| IL-10         | Forward primer | 5'-CTTACTGACTGGCATGAGGATCA-3' |
|               | Reverse primer | 5'-GCAGCTCTAGGAGCATGTGG-3'    |
| IL-17         | Forward primer | 5'-TTTAACTCCCTTGGCGCAAAA-3'   |
|               | Reverse primer | 5'-CTTCCCTCCGCATTGACAC-3'     |
| TNF- $\alpha$ | Forward primer | 5'-CAGGCGGTGCCTATGTCTC-3'     |
|               | Reverse primer | 5'-CGATCACCCCGAAGTTCAGTAG-3'  |
| INF- $\gamma$ | Forward primer | 5'-ATGAACGCTACACACTGCATC-3'   |
|               | Reverse primer | 5'-CCATCCTTTTGCCAGTTCCTC-3'   |

71

72

73

74

75

76 **Supplementary Table S3**

77 The body weight change of mice orally administrated with AH (AH-low, 200  
 78 mg/kg/day; AH-Mid, 400 mg/kg/day; AH-High, 800 mg/kg/day).

| Days | Body weight (g/mouse) |            |            |            |
|------|-----------------------|------------|------------|------------|
|      | Control               | AH-Low     | AH-Mid     | AH-High    |
| 0    | 19.98±0.56            | 20.05±0.31 | 19.95±0.48 | 20.03±0.71 |
| 1    | 20.21±0.52            | 20.28±0.40 | 20.18±0.40 | 20.27±0.72 |
| 2    | 20.42±0.55            | 20.70±0.31 | 20.92±0.49 | 21.03±0.70 |
| 3    | 20.64±0.55            | 21.12±0.33 | 21.23±0.38 | 21.24±0.71 |
| 4    | 20.88±0.53            | 21.38±0.30 | 21.49±0.40 | 21.53±0.59 |
| 5    | 21.19±0.35            | 21.69±0.55 | 21.70±0.50 | 21.39±0.62 |
| 6    | 21.31±0.54            | 21.81±0.31 | 21.83±0.44 | 22.00±0.70 |
| 7    | 21.52±0.55            | 22.04±0.36 | 22.06±0.55 | 22.74±0.77 |

79

80

81

82

83

84

85

86

87

88 **Supplementary Table S4**

89 The daily food intake of mice orally administrated with AH (AH-low, 200 mg/kg/day;  
 90 AH-Mid, 400 mg/kg/day; AH-High, 800 mg/kg/day).

| Days | Food intake (g/mouse) |             |             |             |
|------|-----------------------|-------------|-------------|-------------|
|      | Control               | AH-Low      | AH-Mid      | AH-High     |
| 0    | 3.281±0.123           | 3.242±0.014 | 3.269±0.009 | 3.265±0.325 |
| 1    | 3.199±0.223           | 3.252±0.034 | 3.370±0.029 | 3.315±0.305 |
| 2    | 3.231±0.423           | 3.302±0.124 | 3.314±0.209 | 3.295±0.215 |
| 3    | 3.331±0.443           | 3.248±0.064 | 3.319±0.109 | 3.284±0.205 |
| 4    | 3.131±0.323           | 3.192±0.234 | 3.309±0.219 | 3.309±0.315 |
| 5    | 3.261±0.422           | 3.342±0.314 | 3.359±0.119 | 3.315±0.335 |
| 6    | 3.351±0.523           | 3.322±0.144 | 3.354±0.309 | 3.345±0.125 |
| 7    | 3.401±0.026           | 3.392±0.094 | 3.384±0.249 | 3.365±0.319 |

91

92

93

94

95

96

97

98

99

100 **Supplementary Table S5**

101 Relative abundance of top four gut microbiota at the phylum level.

| Groups  | <i>Firmicutes</i> (%)   | <i>Bacteroidetes</i> (%) | <i>F/B</i> (%)          | <i>Proteobacteria</i> (%) | <i>Tenericutes</i> (%) |
|---------|-------------------------|--------------------------|-------------------------|---------------------------|------------------------|
| Control | 52.56±1.82 <sup>a</sup> | 41.75±1.20 <sup>b</sup>  | 1.26±0.05 <sup>a</sup>  | 4.94±0.32 <sup>a</sup>    | 0.42±0.01 <sup>b</sup> |
| AH-Low  | 48.96±0.64 <sup>a</sup> | 46.56±1.08 <sup>ab</sup> | 1.05±0.04 <sup>ab</sup> | 3.41±0.18 <sup>b</sup>    | 0.41±0.04 <sup>b</sup> |
| AH-Mid  | 49.04±2.41 <sup>a</sup> | 46.04±2.14 <sup>ab</sup> | 1.07±0.10 <sup>ab</sup> | 3.64±0.45 <sup>b</sup>    | 0.72±0.01 <sup>a</sup> |
| AH-High | 45.74±3.02 <sup>a</sup> | 49.95±3.78 <sup>a</sup>  | 0.94±0.13 <sup>b</sup>  | 2.88±0.05 <sup>b</sup>    | 0.70±0.10 <sup>a</sup> |

102 Data are expressed as the mean  $\pm$  SD (n = 5). Values without the same letter (a-b) are  
 103 significantly different ( $p < 0.05$ ).

104

105

106

107

108

109

110

111

112

113

114

115

116



117 **Supplementary Table S6**

118 Relative abundance of top seven classified gut microbiota at the genus level.

| Groups  | Oscillospir<br>a(%)   | Bacteroides<br>s(%)  | Prevotella<br>(%)     | Ruminococcus<br>ccus(%) | Parabacteroides<br>oides(%) | Coprococcus<br>us(%)  | Lactobacillus<br>lus(%) | Staphylococcus<br>occus(%) | Butyrivibrio<br>onas(%) |
|---------|-----------------------|----------------------|-----------------------|-------------------------|-----------------------------|-----------------------|-------------------------|----------------------------|-------------------------|
| Control | 6.3±1.1 <sup>b</sup>  | 3.9±0.3 <sup>c</sup> | 9.8±1.44 <sup>a</sup> | 2.5±0.35 <sup>b</sup>   | 1.8±0.01 <sup>c</sup>       | 1.6±0.06 <sup>b</sup> | 0.3±0.02 <sup>b</sup>   | 1.9±0.50 <sup>a</sup>      | 0.5±0.15 <sup>a</sup>   |
| AH-Low  | 6.0±0.7 <sup>b</sup>  | 6.1±0.3 <sup>b</sup> | 0.5±0.04 <sup>b</sup> | 2.7±0.28 <sup>ab</sup>  | 2.6±0.24 <sup>b</sup>       | 1.5±0.17 <sup>b</sup> | 0.8±0.11 <sup>b</sup>   | 1.0±0.08 <sup>b</sup>      | 0.5±0.10 <sup>a</sup>   |
| AH-Mid  | 8.9±0.4 <sup>a</sup>  | 6.5±0.2 <sup>b</sup> | 1.5±0.68 <sup>b</sup> | 3.4±0.02 <sup>a</sup>   | 4.6±0.19 <sup>a</sup>       | 2.2±0.08 <sup>a</sup> | 2.2±0.48 <sup>a</sup>   | 0.2±0.04 <sup>c</sup>      | 0.7±0.16 <sup>a</sup>   |
| AH-High | 6.9±0.2 <sup>ab</sup> | 8.8±0.2 <sup>a</sup> | 0.4±0.04 <sup>b</sup> | 3.2±0.03 <sup>ab</sup>  | 2.8±0.30 <sup>b</sup>       | 2.3±0.16 <sup>a</sup> | 0.9±0.02 <sup>b</sup>   | 0.2±0.02 <sup>c</sup>      | 0.4±0.02 <sup>a</sup>   |

119 Data are expressed as the mean  $\pm$  SD (n = 5). Values without the same letter (a-c) are

120 significantly different ( $p < 0.05$ ).

121
